# Supplementary material for: A bifunctionalized organic–inorganic hybrid silica: synergistic effect enhances enantioselectivity
Source: Royal Society of Chemistry journal article supplement (doi:10.1039/c2cc36350j), 2012-01-01
Supplement: c2cc36350j.pdf [file c2cc36350j.pdf]

Supporting Information for

**A Bifunctionalized Organic-Inorganic Hybrid Silica: Synergistic Effect  
Enhances Enantioselectivity**

Wei Xiao, Ronghua Jin, Tanyu Cheng,\* Daquan Xia, Hui Yao, Fei Gao, Boxin Deng, Guohua Liu\*

Key Laboratory of Resource Chemistry of Ministry of Education, Shanghai Key Laboratory of Rare Earth  
Functional Materials, Shanghai Normal University, Shanghai 200234, P. R. China

|              | <b>Content</b>                                                                                                                                                                                                              | <b>Page</b> |
|--------------|-----------------------------------------------------------------------------------------------------------------------------------------------------------------------------------------------------------------------------|-------------|
| Experimental | General and characterization and preparation of the catalysts <b>3</b> .                                                                                                                                                    | S2          |
| Figure S1    | FT-IR spectra of the IBOIHS ( <b>1</b> ) and the catalyst <b>3</b>                                                                                                                                                          | S4          |
| Figure S2    | <sup>13</sup> C CP MAS NMR spectra of the IBOIHS ( <b>1</b> ) and the catalyst <b>3</b> .                                                                                                                                   | S4          |
| Figure S3    | <sup>29</sup> Si CP MAS NMR spectra of the IBOIHS ( <b>1</b> ) and the catalyst <b>3</b> .                                                                                                                                  | S5          |
| Figure S4    | TG/DTA curves of the IBOIHS ( <b>1</b> ) and the catalyst <b>3</b> .                                                                                                                                                        | S5          |
| Figure S5    | Nitrogen adsorption-desorption isotherms of the IBOIHS and the catalyst <b>3</b> .                                                                                                                                          | S7          |
| Figure S6    | SEM image of the catalyst <b>3</b>                                                                                                                                                                                          | S7          |
| Figure S7    | A comparison of the asymmetric transfer hydrogenation of 4-methylacetophenone catalyzed by the catalyst <b>3</b> and the homogeneous Cp*IrTsDPEN without Bu <sub>4</sub> NBr as a phase transfer catalyst in aqueous medium | S8          |
| Table 1      | Asymmetric transfer hydrogenation of the catalyst <b>3</b> .                                                                                                                                                                | S9          |
| Figure S8    | Asymmetric transfer hydrogenation of the catalyst <b>3</b> .                                                                                                                                                                | S10         |
| Table S1     | Reusability of the catalyst <b>3</b> using acetophenone as a substrate.                                                                                                                                                     | S15         |
| Figure S9    | Reusability of the catalyst <b>3</b> using acetophenone as a substrate.                                                                                                                                                     | S15         |
| Table 2      | Scope of <b>3</b> -catalyzed asymmetric transfer hydrogenation.                                                                                                                                                             | S19         |
| Figure S10   | Scope of <b>3</b> -catalyzed asymmetric transfer hydrogenation.                                                                                                                                                             | S20         |

## Experimental

### 1. General

All experiments, which are sensitive to moisture or air, were carried out under an Ar atmosphere using the standard Schlenk techniques. (*S,S*)-1,2-diphenylenediamine [(*S,S*)-DPEN] and [Cp\*IrCl<sub>2</sub>]<sub>2</sub> were purchased from Sigma-Aldrich Company Ltd. Compound [(*S,S*)-DPEN-SO<sub>2</sub>Ph(CH<sub>2</sub>)<sub>2</sub>Si(OMe)<sub>3</sub>] and the pure materials IBOIHS were synthesized according to the reported literature [a) *Chem Commun.* **2011**, 47, 2583. b) *Chem. Commun.* **2010**, 46, 6947.].

### 2. Characterization

Ir and Rh loading amounts in the catalysts were analyzed using an inductively coupled plasma optical emission spectrometer (ICP, Varian VISTA-MPX). Fourier transform infrared (FTIR) spectra were collected on a Nicolet Magna 550 spectrometer using KBr method. X-ray powder diffraction (XRD) was carried out on a Rigaku D/Max-RB diffractometer with CuK $\alpha$  radiation. Scanning electron microscopy (SEM) images were obtained using a JEOL JSM-6380LV microscope operating at 20 kV. Transmission electron microscopy (TEM) images were performed on a JEOL JEM2010 electron microscope at an acceleration voltage of 220 kV. X-ray photoelectron spectroscopy (XPS) measurements were performed on a Perkin-Elmer PHI 5000C ESCA system. All the binding energies were calibrated by using the contaminant carbon (C<sub>1s</sub> = 284.6 eV) as a reference. Nitrogen adsorption isotherms were measured at 77 K with a Quantachrome Nova 4000 analyzer. The samples were measured after being outgassed at 423 K overnight. Pore size distributions were calculated by using the BJH model. The specific surface areas (SBET) of samples were determined from the linear parts of BET plots ( $p/p_0 = 0.05-1.00$ ). Thermal gravimetric analysis (TGA) was performed with a Perkin-Elmer Pyris Diamond TG analyzer under air atmosphere with a heating ramp of 5 K/min. Solid-state <sup>13</sup>C (100.5 MHz) and <sup>29</sup>Si (79.4 MHz) CP MAS NMR were obtained on a Bruker DRX-400 spectrometer. Elemental analysis was performed with a Carlo Erba 1106 Elemental Analyzer.

### 3. Preparation of Cp\*IrTsDPEN- IBOIHS (3).

Under argon atmosphere, to a stirred suspension of IBOIHS (**1**) (2.0 g) in 20 mL dry toluene was added a solution of TsDPEN-derived silane (**2**) (0.40 g, 0.80 mmol) in 5 mL dry toluene at room temperature. The resulting mixture was refluxed for 24 h. After cooling to room

temperature, the volatiles were removed in *vacuo* and 50 mL of water was added. The residues were filtrated and washed twice with 50 mL of water and 50 mL of CH<sub>2</sub>Cl<sub>2</sub> to afford (*R,R*)-TsDPEN-modified IBOIHS as a white powder. The collected white powder was suspended in 20 mL of CH<sub>2</sub>Cl<sub>2</sub> again. To this stirred suspension was added [Cp\*IrCl<sub>2</sub>]<sub>2</sub> (0.39 g, 0.49 mmol) and excess NEt<sub>3</sub> at room temperature. The resulting mixture was stirred and refluxed for 12 h. Then the residues were filtrated and washed twice with 20 mL of dry CH<sub>2</sub>Cl<sub>2</sub>. After Soxlet extraction in dry CH<sub>2</sub>Cl<sub>2</sub> to remove homogeneous and unreacted start materials, the solid was dried under reduced pressure overnight to afford Cp\*IrTsDPEN-IBOIHS (**3**) (2.50, 0.58 mmol, 72% relative to **1**) as a light yellow powder. ICP analysis showed that the Ir loading-amount was 44.12 mg (0.23 mmol) per gram catalyst. IR (KBr) cm<sup>-1</sup>: 3433.3 (s), 3138.5 (s), 2928.7 (w), 2364.4 (w), 2344.4 (w), 1637.5 (w), 1560.8 (s), 1458.6 (s), 1328.1 (w), 1129.8 (s), 1051.0 (s), 921.3 (w), 764.1 (w), 700.4(w), 586.5(w), 485.4 (w); <sup>29</sup>Si MAS/NMR (300 MHz): T<sup>3</sup> (δ = -68.9 ppm), T<sup>2</sup> (δ = -59.6 ppm), T<sup>1</sup> (δ = -50.2 ppm); <sup>13</sup>C CP/MAS (161.9 MHz): 9.8 (CH<sub>2</sub>-Si), 14.1 (CH<sub>3</sub>-Cp\*), 24.3 (PhCH<sub>2</sub>, and SiCH<sub>2</sub>CH<sub>2</sub>CH<sub>2</sub>N), 52.4 (CH<sub>3</sub>-O, and imidazolium N-CH<sub>2</sub>), 73.0, 77.7 (PhN-CH<sub>2</sub>), 96.8 (C-Cp), 123.4 (CH of imidazolium) 128.8 (CH-Ph), 136.6 CH of imidazolium) ppm; Elemental analysis (%): C 32.78, H 5.11, N 5.42, S 0.48.

**4. Catalytic experiments.** A typical procedure was as follows: The catalyst **3** (26.7 mg, 4.0 μmol of Ir based on the ICP analysis), HCO<sub>2</sub>Na (0.27 g, 10.0 mmol), ketone (0.40 mmol) and 2.0 mL of water were added in a 10 mL roundbottom flask in turn. The mixture was allowed to react at 40 °C for 30 min to 5 h. During that time, the reaction was monitored constantly by TLC. After completion of the reaction, the catalyst was separated *via* centrifuge (10000 r/min) for the recycle experiment. The aqueous solution was extracted by Et<sub>2</sub>O (3 × 3.0 mL). The combined Et<sub>2</sub>O was washed with brine twice and dehydrated with Na<sub>2</sub>SO<sub>4</sub>. After the evaporation of Et<sub>2</sub>O, the residue was purified by silica gel flash column chromatography to afford the desired product. The conversion and the ee value could be determined by chiral GC using a Supelco β-Dex 120 chiral column (30 m × 0.25 mm (i.d.), 0.25 μm film) or a HPLC analysis with a UV-Vis detector using a Daicel Chiralcel columns (Φ 0.46 × 25 cm).

**Figure S1.** FT-IR spectra of the IBOIHS (**1**) and the catalyst **3**.

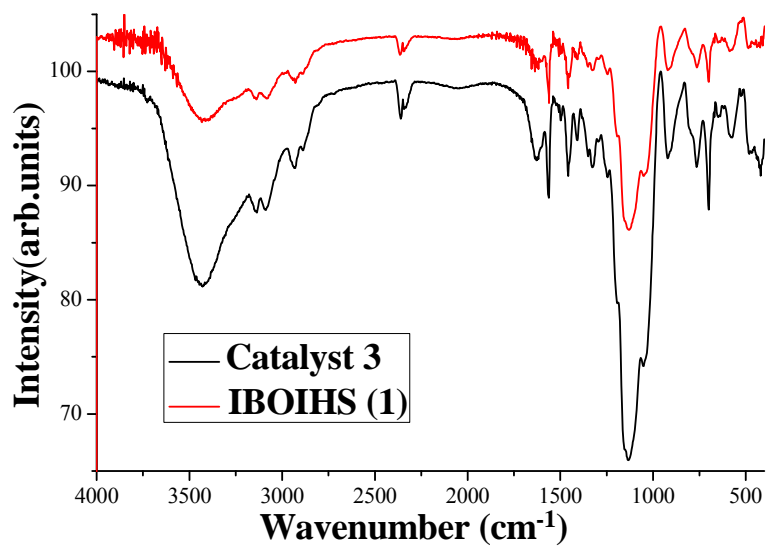

**Figure S2.** <sup>13</sup>C CP MAS NMR spectra of the IBOIHS (**1**) and the catalyst **3**.

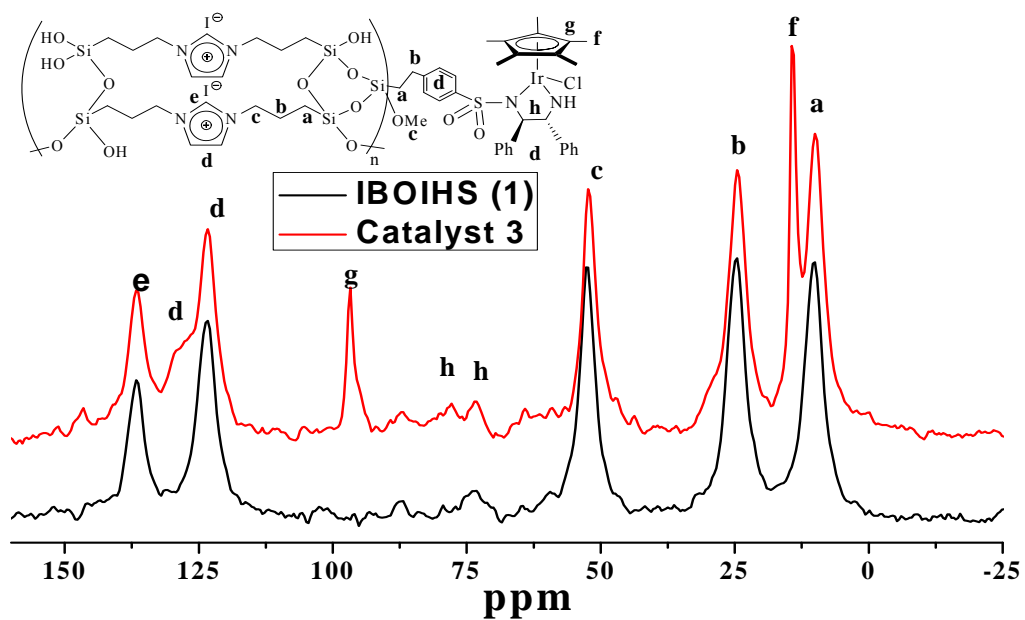

**Figure S3.**  $^{31}\text{Si}$  CP MAS NMR spectra of the pure IBOIHS material and the catalyst **3**.

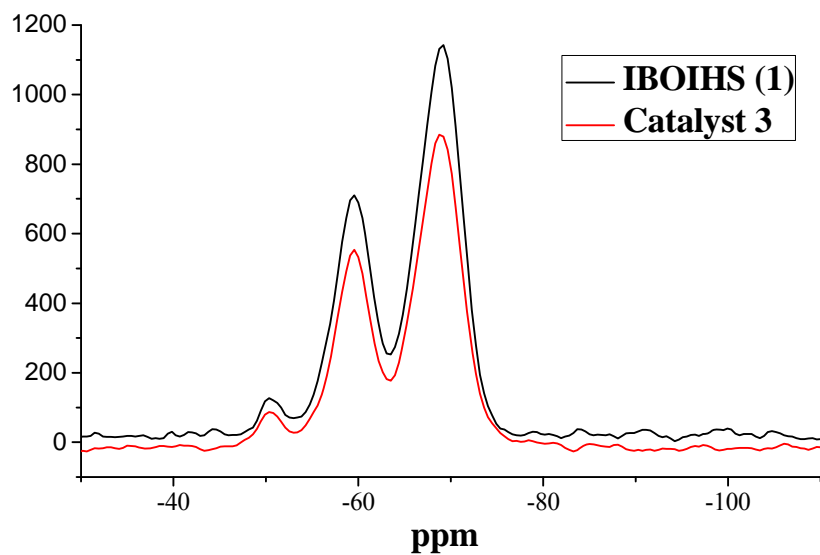

**Figure S4.** TG/DTA curves of the IBOIHS (**1**) and the catalyst **3**.

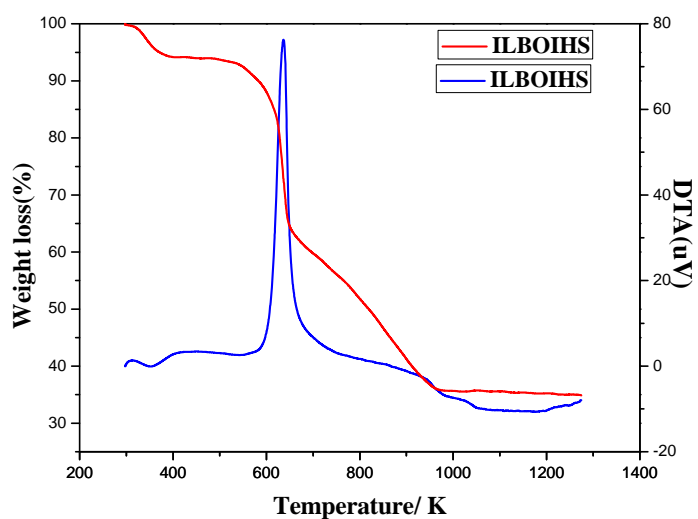

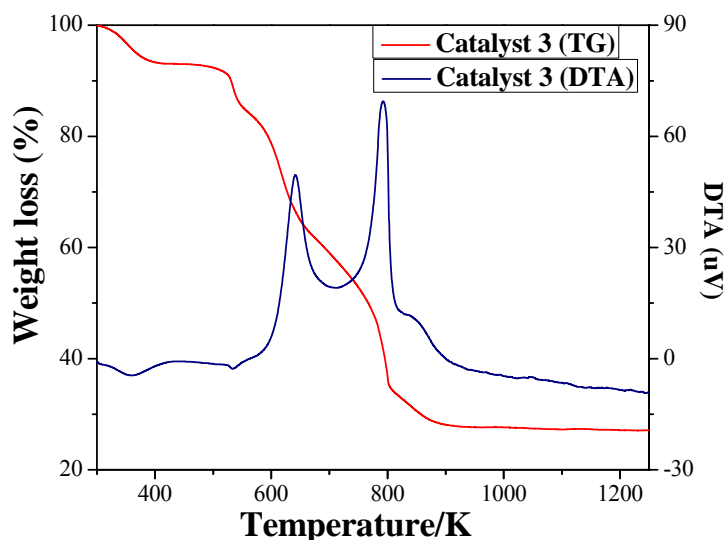

**Explanation:** The TG/DTA curve of the IBOIHS (**1**) was treated in the air as shown in Figure S5. An endothermic peak around 351K with weight loss of 5.8% could be attributed to the release of physical adsorption water. In addition, the weight loss of 58.4% between 453 and 1100K could be assigned to the oxidation of alkyl fragments and parts of imidazolium fragments. When eliminated the contribution of water, the total weight loss the oxidation of alkyl fragments and parts of imidazolium fragments is 62.0% (58.4/94.2).

In sharp contrast to TG/DTA curve of the IBOIHS (**1**), an endothermic peak around 351K with weight loss of 6.9% could be attributed to the release of physical adsorption water. In addition, the weight loss of 65.4% between 453 and 1100K could be assigned to the oxidation of organic moiety (including alkyl fragments, parts of imidazolium fragments and Cp\*IrTsDPEN fragments). When eliminated the contribution of water, the total weight loss the oxidation of organic moiety is 70.2% (65.4/93.1).

Thus, in sharp contrast to TG/DTA curve of **1**, the true weight loss of Cp\*IrTsDPEN organic molecules is 8.2% (70.2-62.0), meaning the mole amounts of Cp\*IrTsDPEN is 28.61 mg/g (0.149 mmol), which was nearly consistent with 28.86 mg (0.150 mmol) of Ir loading per gram catalyst detected by inductively coupled plasma (ICP) optical emission spectrometer analysis.

**Figure 5.** Nitrogen adsorption-desorption isotherms of the IBOIHS (1) and the catalyst 3.

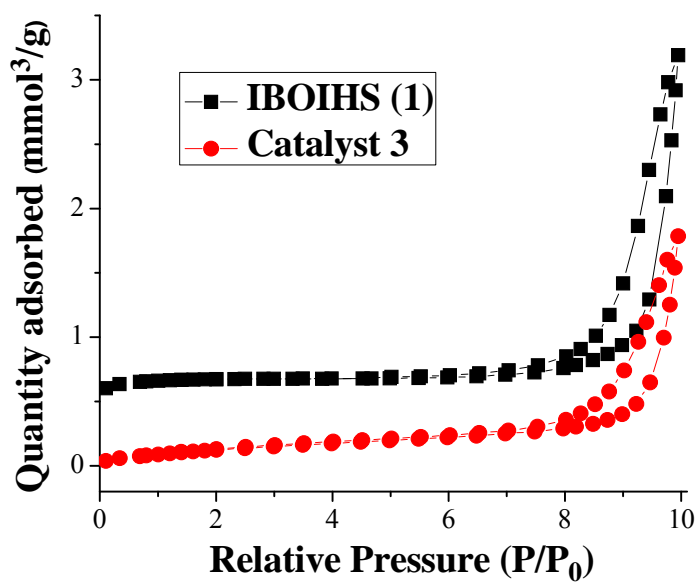

**Figure 6.** The SEM image of the catalyst 3.

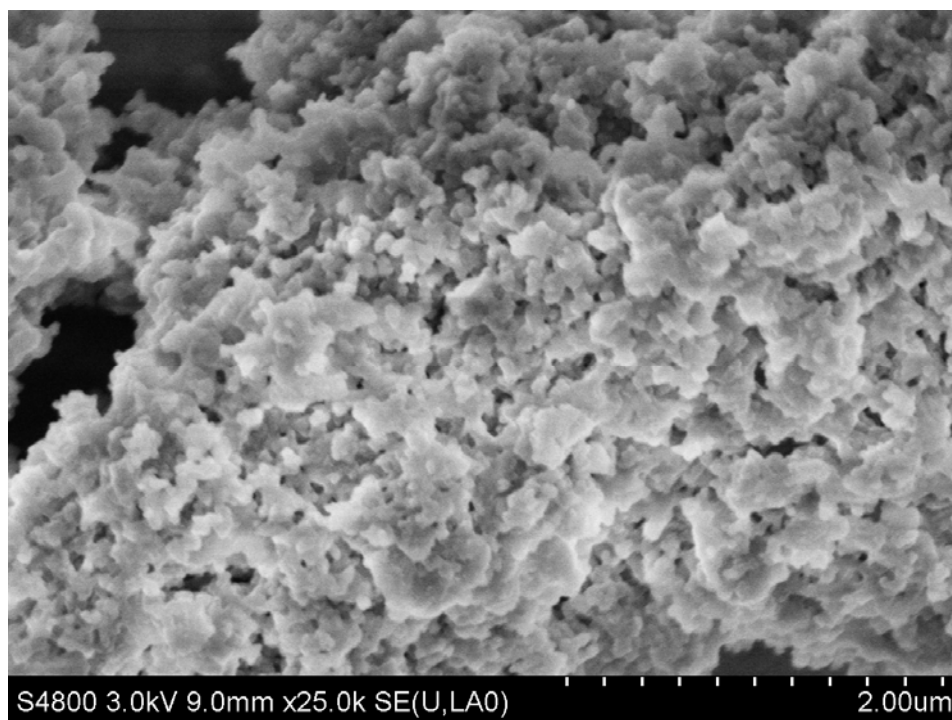

**Figure 7.** A comparison of the asymmetric transfer hydrogenation of 4-methylacetophenone catalyzed by the catalyst 3 and the homogeneous Cp\*IrTsDPEN without Bu<sub>4</sub>NBr as a phase transfer catalyst in aqueous medium (Reactions were carried out at an S/C ratio of 100).

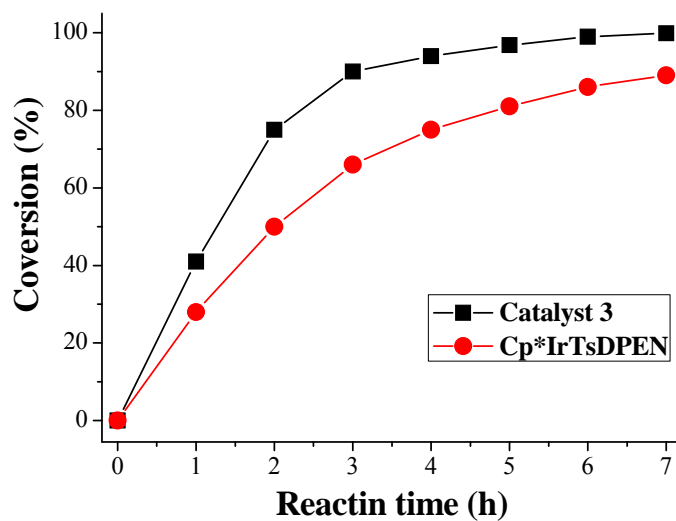



**Table 1.** Asymmetric transfer hydrogenation of the catalyst **3**.<sup>[a]</sup>

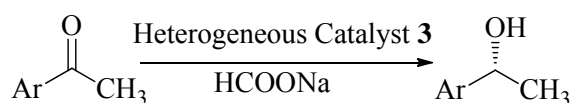

| Entry | Ar                   | Time   | Conv. (%) <sup>b</sup> | Ee. (%) <sup>b</sup>  |
|-------|----------------------|--------|------------------------|-----------------------|
| 1     | Ph                   | 3(3.5) | >99 (95)               | 95(92) <sup>[c]</sup> |
| 2     | Ph                   | 3      | 78                     | 92 <sup>[d]</sup>     |
| 3     | Ph                   | 3      | >99(>99)               | 92(92) <sup>[e]</sup> |
| 4     | 4-FPh                | 3(4)   | >99(97)                | 94(89) <sup>[c]</sup> |
| 5     | 4-ClPh               | 3(4)   | >99 (99)               | 90(84) <sup>[c]</sup> |
| 6     | 4-MePh               | 7(15)  | >99 (96)               | 92(88) <sup>[c]</sup> |
| 7     | 4-OMePh              | 20(24) | >99 (97)               | 92(91)                |
| 8     | 3-OMePh              | 5(8)   | >99(97)                | 95(90) <sup>[c]</sup> |
| 9     | 4-NO <sub>2</sub> Ph | 1.0(2) | >99 (98)               | 82(73) <sup>[c]</sup> |
| 10    | 4-CNPh               | 2(2)   | >99                    | 84(84)                |
| 11    | 4-CF <sub>3</sub> Ph | 12     | >99                    | 88                    |
| 12    | 2-naphthyl           | 9(10)  | >99(99)                | 83(80)                |

<sup>[a]</sup> Reaction conditions: catalyst **3** (26.7 mg, 4.0 μmol of Ir based on the ICP analysis), HCO<sub>2</sub>Na (0.27 g, 10.0 mmol), ketone (0.40 mmol) and 2.0 mL water, reaction temperature (40 °C).

<sup>[b]</sup> Determined by chiral GC and HPLC analysis (see SI in Figure S8).

<sup>[c]</sup> Data in bracket were obtained in the literature (*Chem. Eur. J.* **2008**, *14*, 2209) using homogeneous Cp\*IrDPEN as a catalyst with Bu<sub>4</sub>NBr as a phase transfer catalyst.

<sup>[d]</sup> Data in bracket were obtained using homogeneous Cp\*IrDPEN as a catalyst without Bu<sub>4</sub>NBr as a phase transfer catalyst.

<sup>[e]</sup> Data were obtained using IBOIHS (or 1,3-dibutyl-1H-imidazolium iodide) plus Cp\*IrTsDPEN as a heterogeneous catalyst.

**Translation of Chinese to English is as follows:**

| Peak | RetTime [min] | Heigh  | Area      | Concentration | half-width |
|------|---------------|--------|-----------|---------------|------------|
| 1    | 20.773        | 1109   | 5632.2    | 49.9035       | 5.08       |
| 2    | 21.187        | 1099   | 5654.0    | 50.0965       | 5.14       |
| 总计:  |               | Σ=2208 | Σ=11286.2 | Σ=100.0000    |            |

| Peak | RetTime [min] | Area     | Area%   | Heigh   | Heigh%  |
|------|---------------|----------|---------|---------|---------|
| 1    | 18.474        | 235819.9 | 92.0500 | 13927.2 | 79.0895 |
| 2    | 19.395        | 9109.7   | 3.5589  | 1042.4  | 5.9806  |

**Figure S8.** Asymmetric transfer hydrogenation of the catalyst **3**.

Asymmetric transfer hydrogenation of acetophenone using **3** as a catalyst.

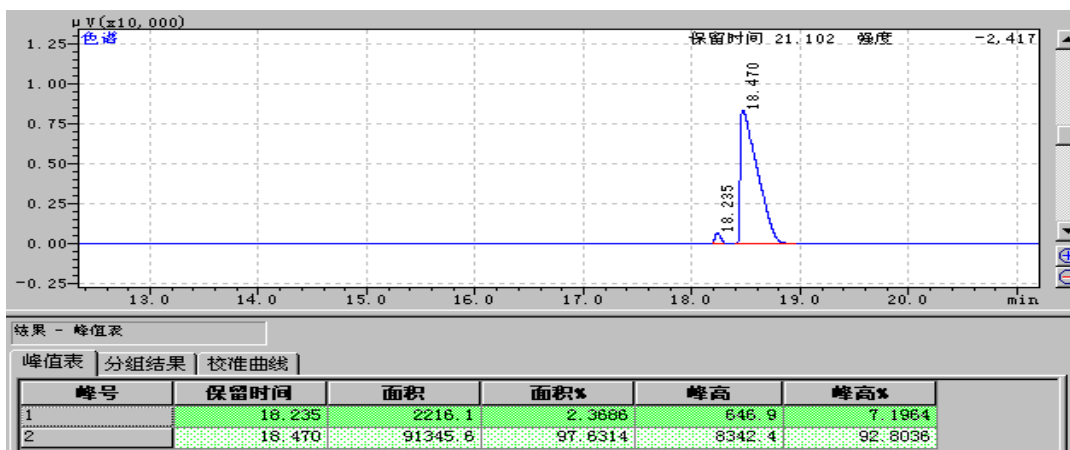

Asymmetric transfer hydrogenation of acetophenone using **3** as a catalyst without Bu<sub>4</sub>NBr.

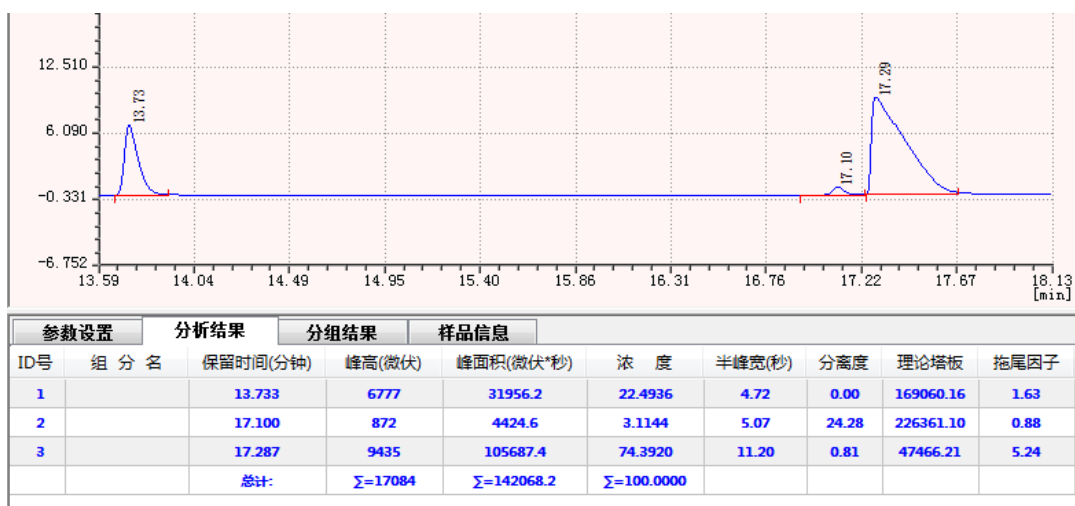

Asymmetric transfer hydrogenation of acetophenone using IBOIHS (**1**) plus Cp\*IrTsDPEN as a catalyst.

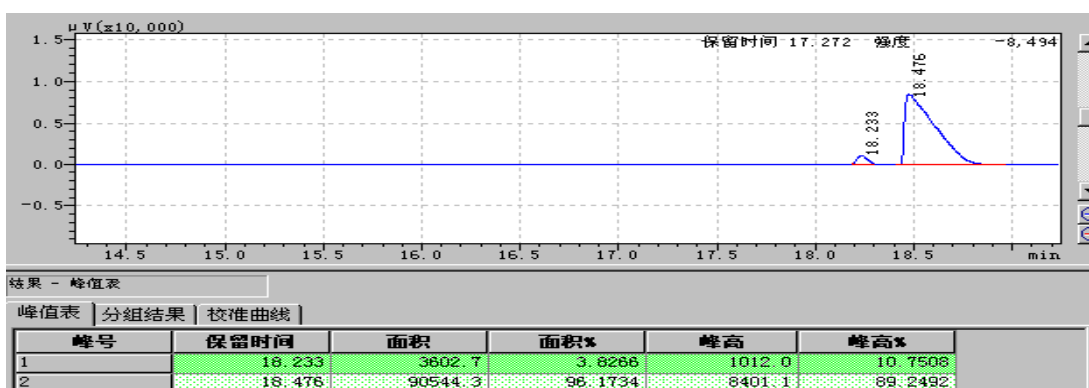

Asymmetric transfer hydrogenation of acetophenone using Cp\*IrTsDPEN plus 1,3-dibutyl-1H-imidazolium iodide as a catalyst.

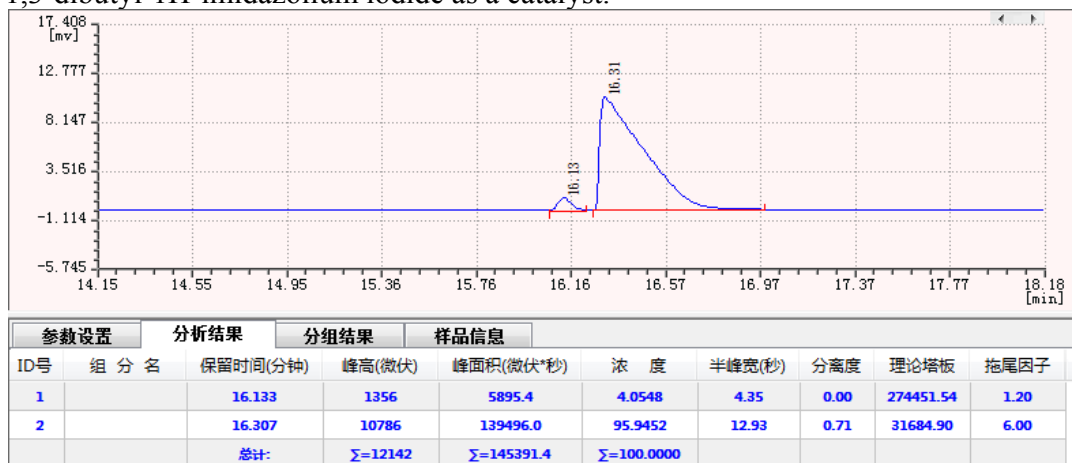

Asymmetric transfer hydrogenation of 4-fluoroacetophenone using **3** as a catalyst.

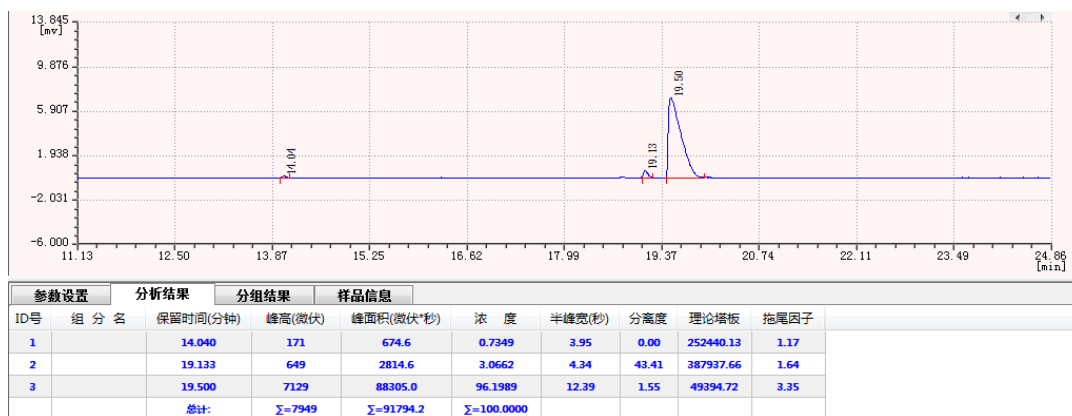

Asymmetric transfer hydrogenation of 4-chloroacetophenone using **3** as a catalyst.

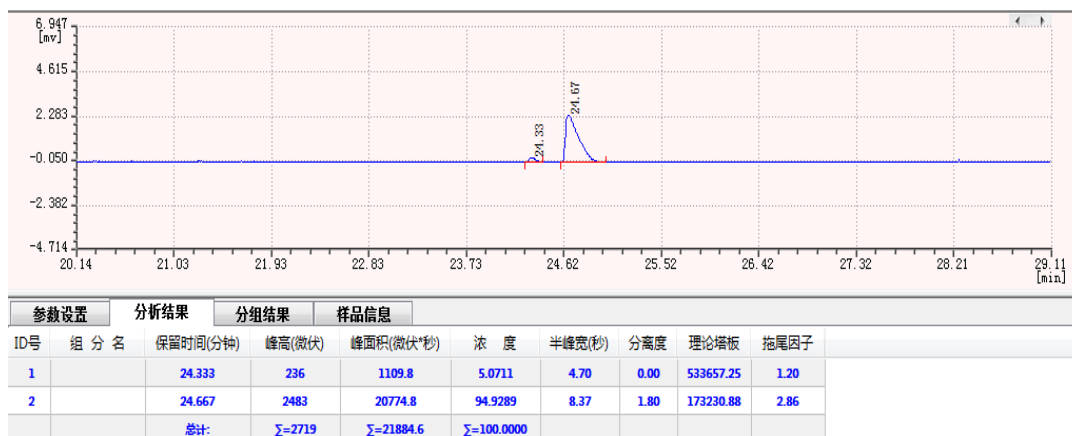

Asymmetric transfer hydrogenation of 4-methylacetophenone using **3** as a catalyst.

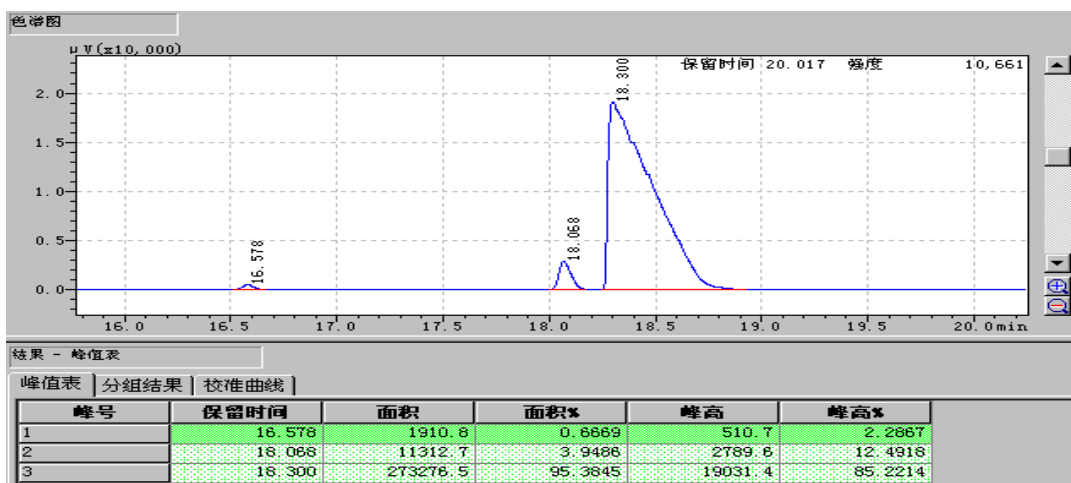

Asymmetric transfer hydrogenation of 4-methoxyacetophenone using **3** as a catalyst.

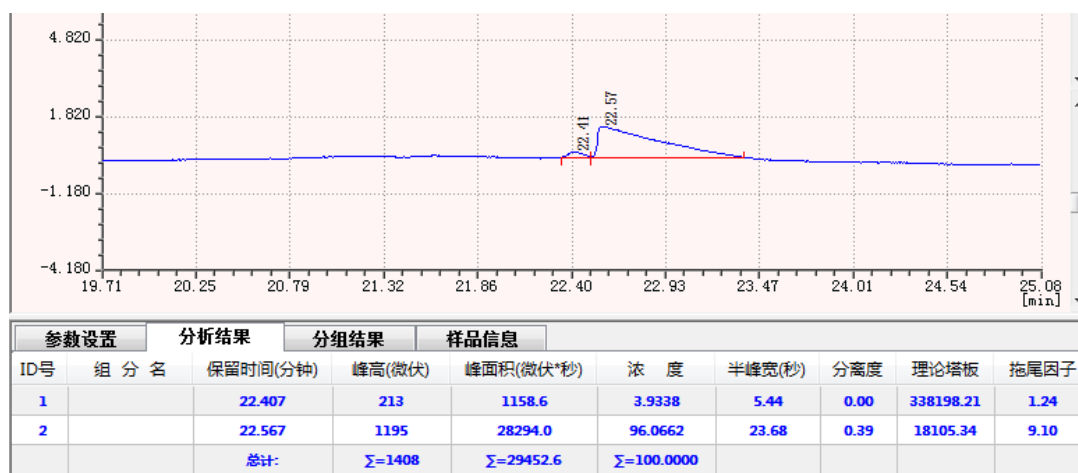

Asymmetric transfer hydrogenation of 3-methoxyacetophenone using **3** as a catalyst.

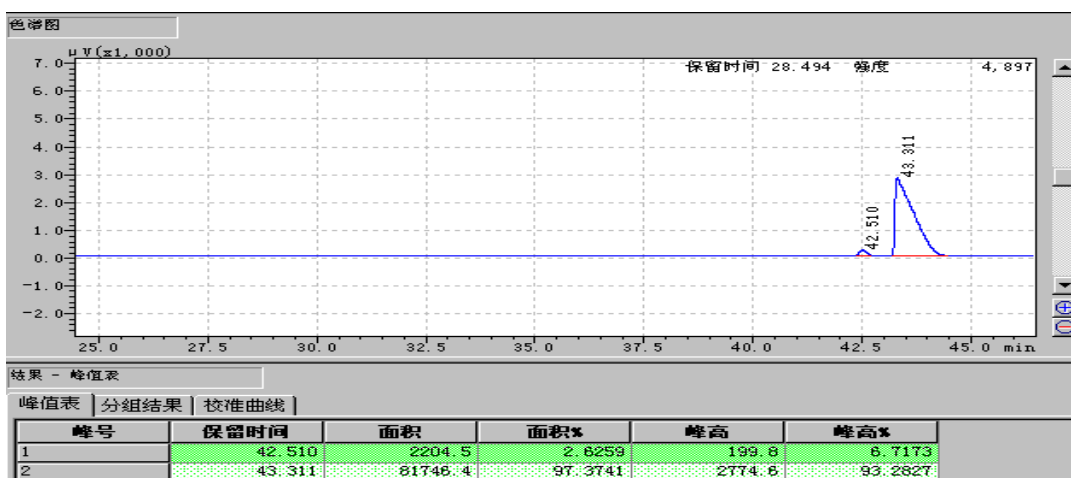

Asymmetric transfer hydrogenation of 4-nitroacetophenone using **3** as a catalyst.

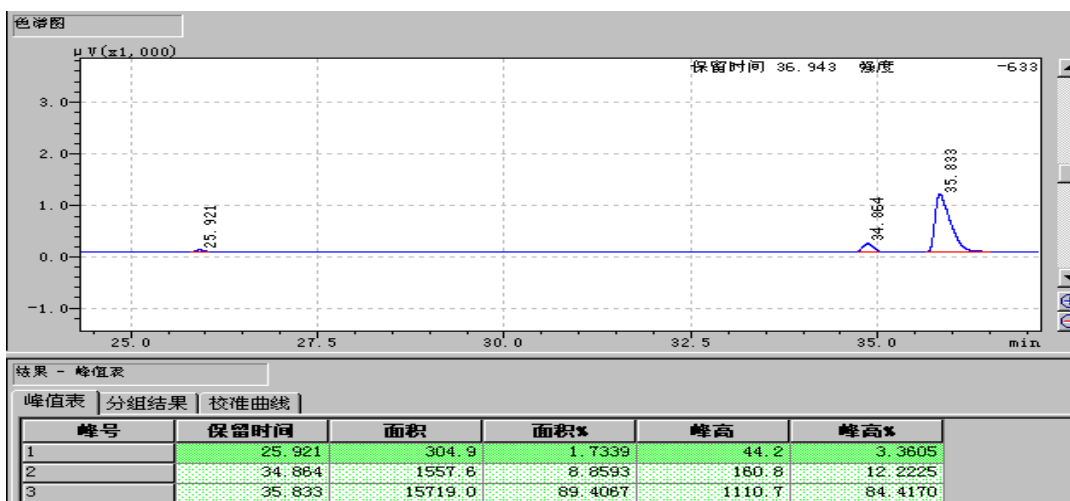

Asymmetric transfer hydrogenation of 4-cyanoacetophenone using **3** as a catalyst.

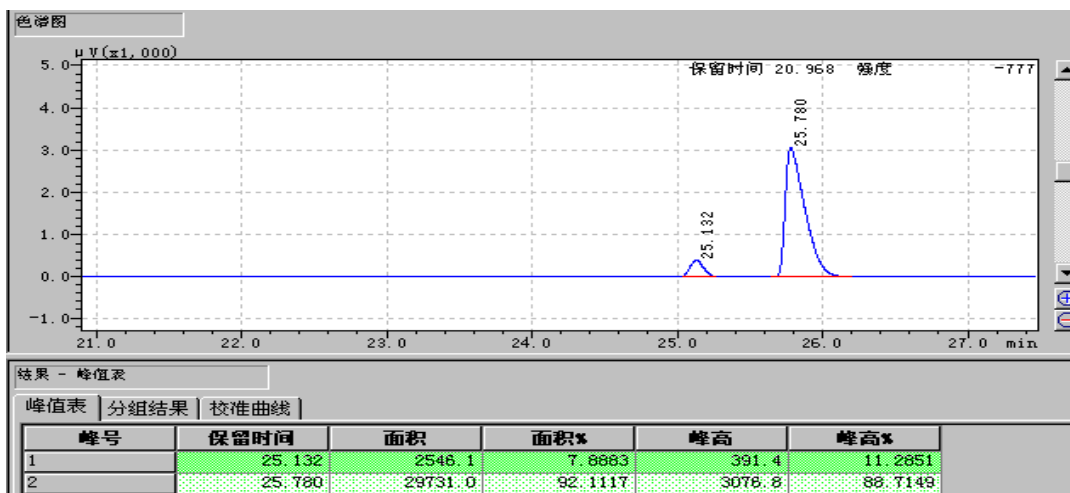

Asymmetric transfer hydrogenation of 4-(trifluoromethyl)acetophenone.

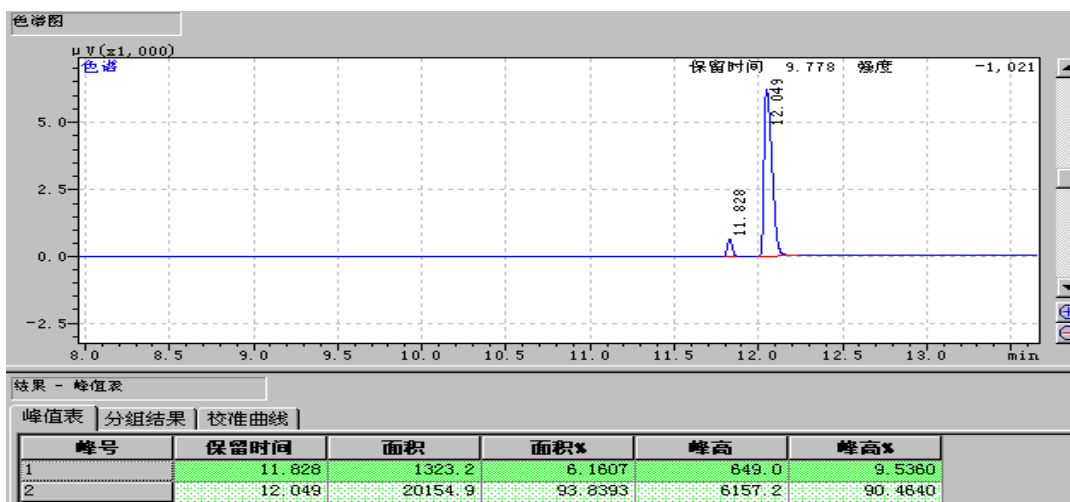

Asymmetric transfer hydrogenation of 2-acetonaphthone. (Daicel OJ-H chiralcel columns: 1.0 mL/min, 2-propanol: n-hexane=7:93, T=40 °C.) ref: [Liu, P. N.; Gu, P. M.; Wang F.; Tu, Y. Q. Org. Lett., 2004, 6, 169.].

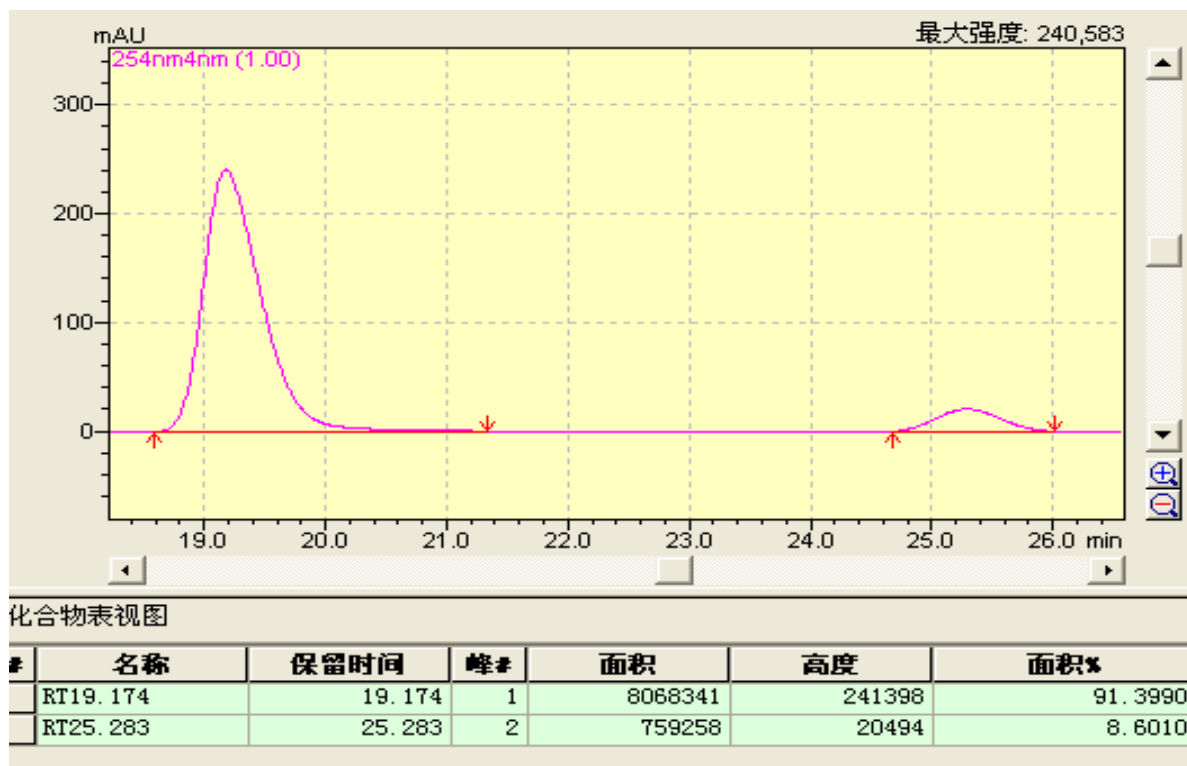

**Table S1.** Reusability of the catalyst **3** for asymmetric transfer hydrogenation of acetophenone.<sup>a</sup>

| Run time  | 1    | 2    | 3    | 4    | 5    | 6    | 7    | 8    | 9    | 10   | 11   |
|-----------|------|------|------|------|------|------|------|------|------|------|------|
| Conv. [%] | 99.9 | 99.9 | 99.1 | 99.9 | 99.9 | 99.9 | 97.6 | 99.9 | 99.9 | 99.5 | 99.2 |
| ee [%]    | 95.3 | 94.6 | 94.7 | 94.5 | 94.4 | 94.4 | 94.5 | 94.2 | 94.2 | 94.2 | 93.5 |

<sup>[a]</sup> Reaction conditions: catalyst **3** (26.7 mg, 4.0 μmol of Ir based on the ICP analysis), HCO<sub>2</sub>Na (0.27 g, 10.0 mmol), ketone (0.40 mmol) and 2.0 mL water, reaction temperature (40 °C). <sup>[b]</sup> Determined by chiral GC analysis (Fig. S9).

**Figure S9.** Reusability of the catalyst **3** using acetophenone as a substrate.

Recycle 2 of the catalyst **3** using acetophenone as a substrate.

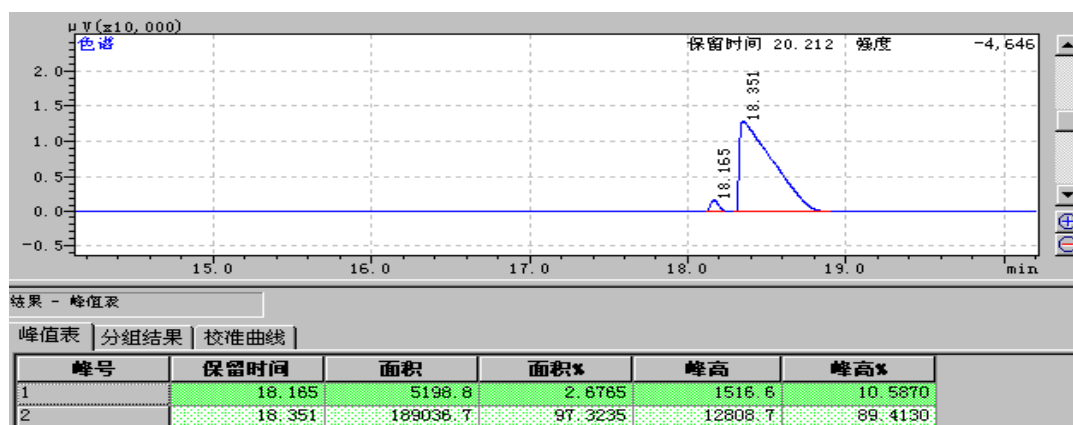

Recycle 3 of the catalyst **3** using acetophenone as a substrate.

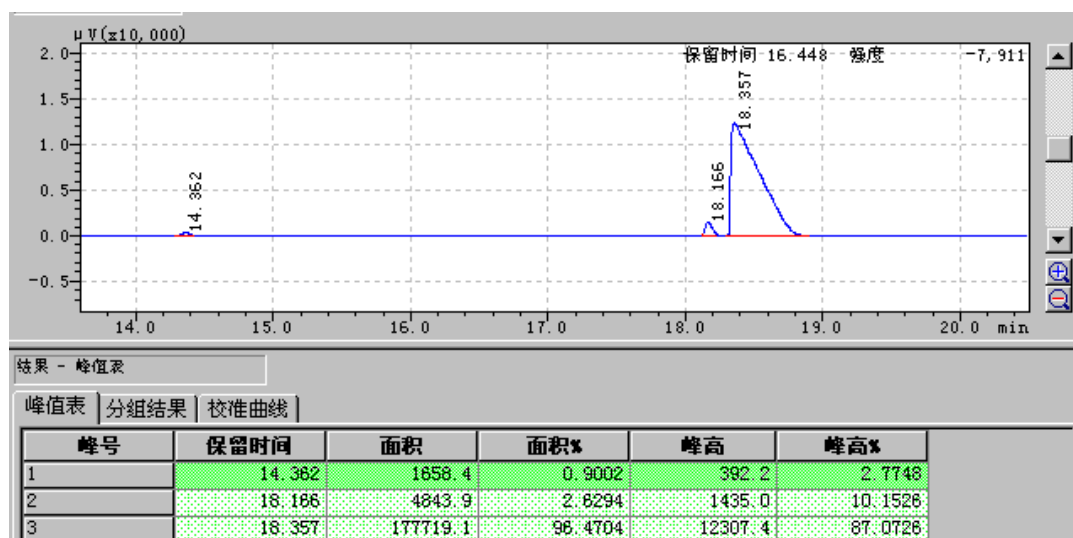

Recycle 4 of the catalyst **3** using acetophenone as a substrate.

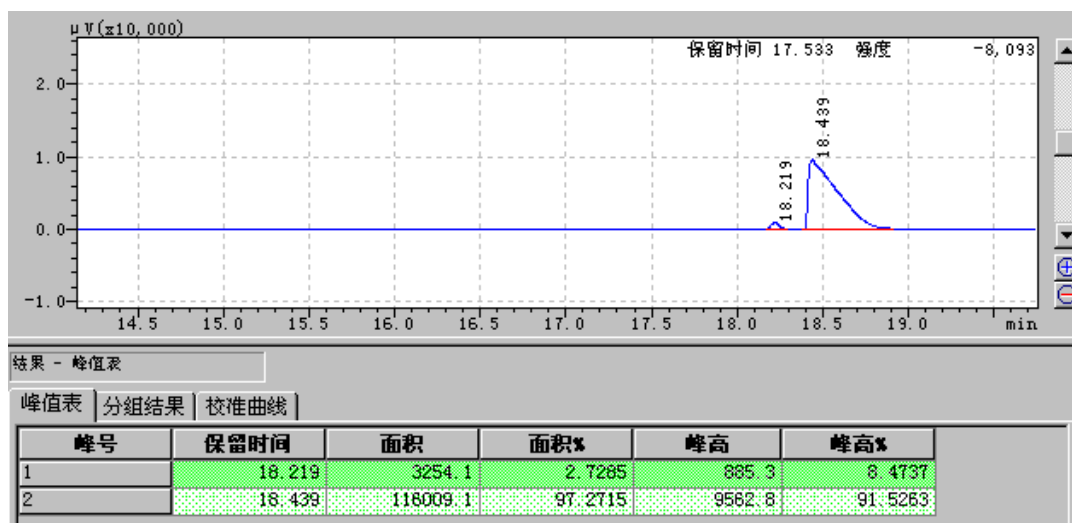

Recycle 5 of the catalyst **3** using acetophenone as a substrate.

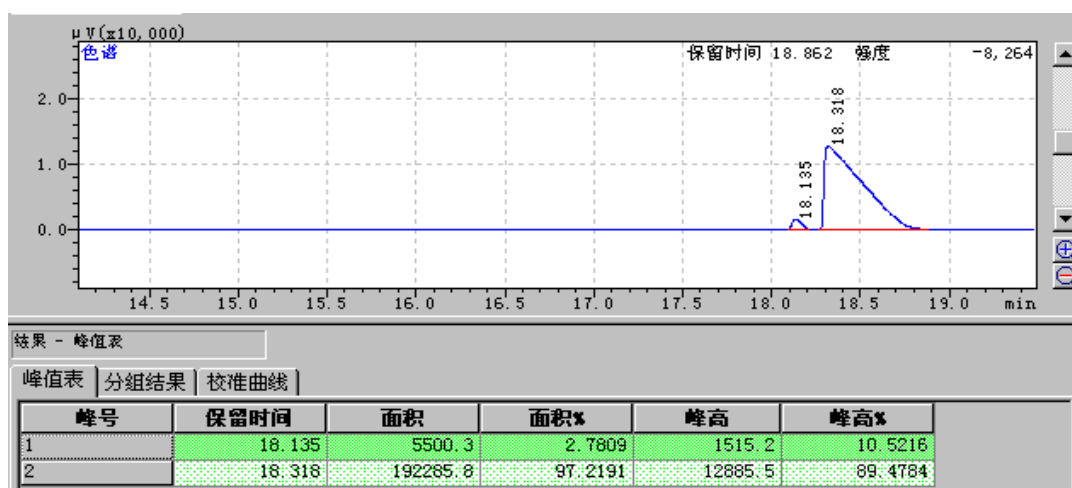

Recycle 6 of the catalyst **3** using acetophenone as a substrate.

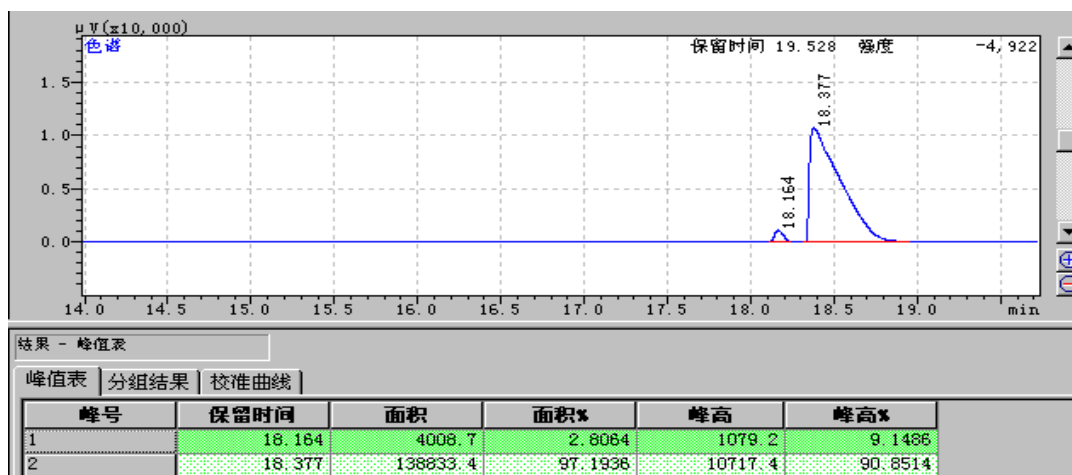



Recycle 7 of the catalyst **3** using acetophenone as a substrate.

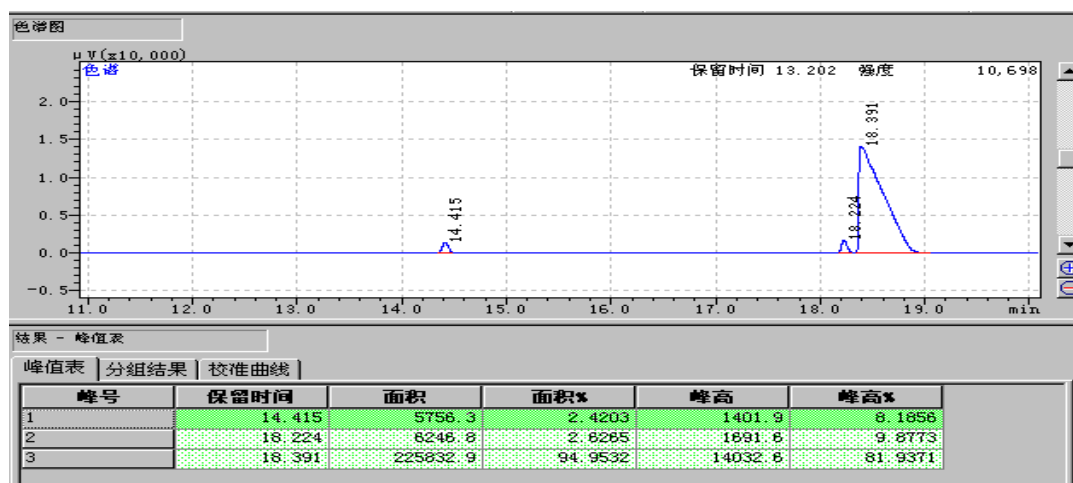

Recycle 8 of the catalyst **3** using acetophenone as a substrate.

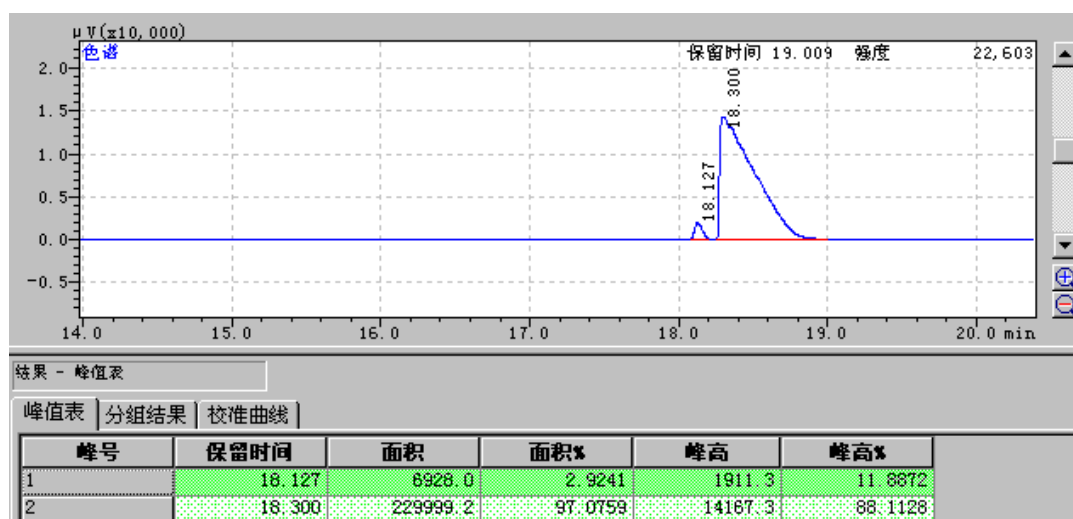

Recycle 9 of the catalyst **3** using acetophenone as a substrate.

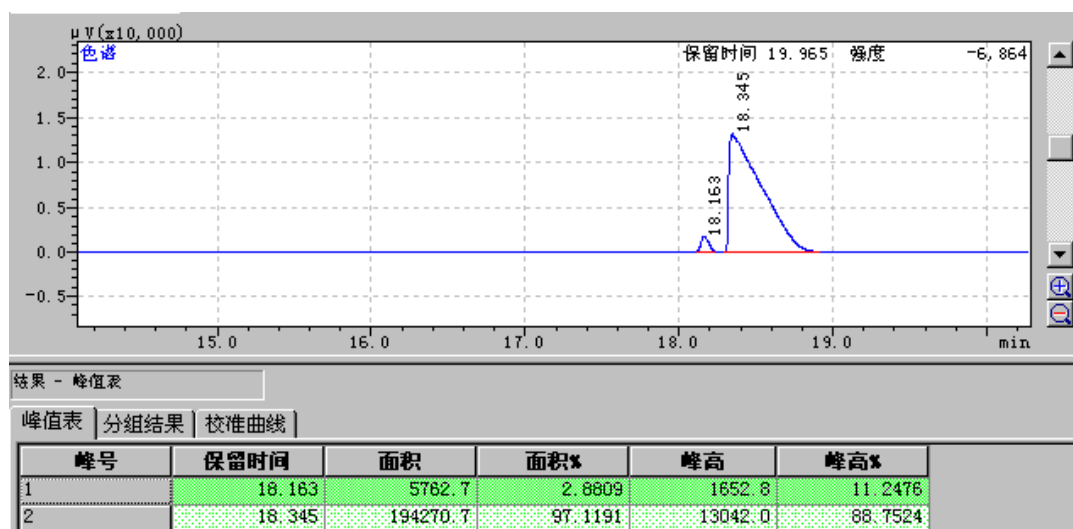

Recycle 10 of the catalyst **3** using acetophenone as a substrate.

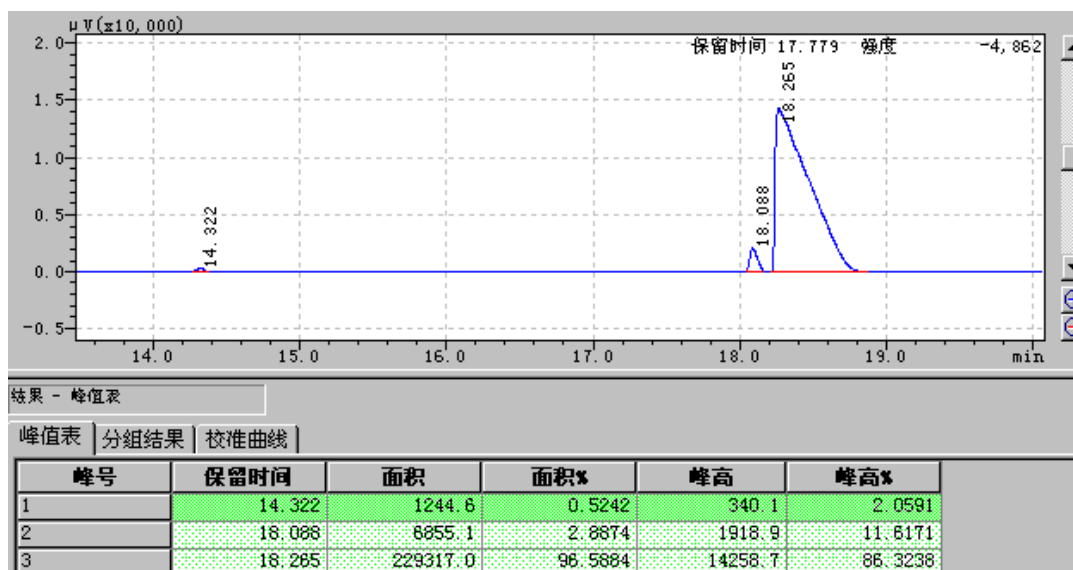

Recycle 11 of the catalyst **3** using acetophenone as a substrate.

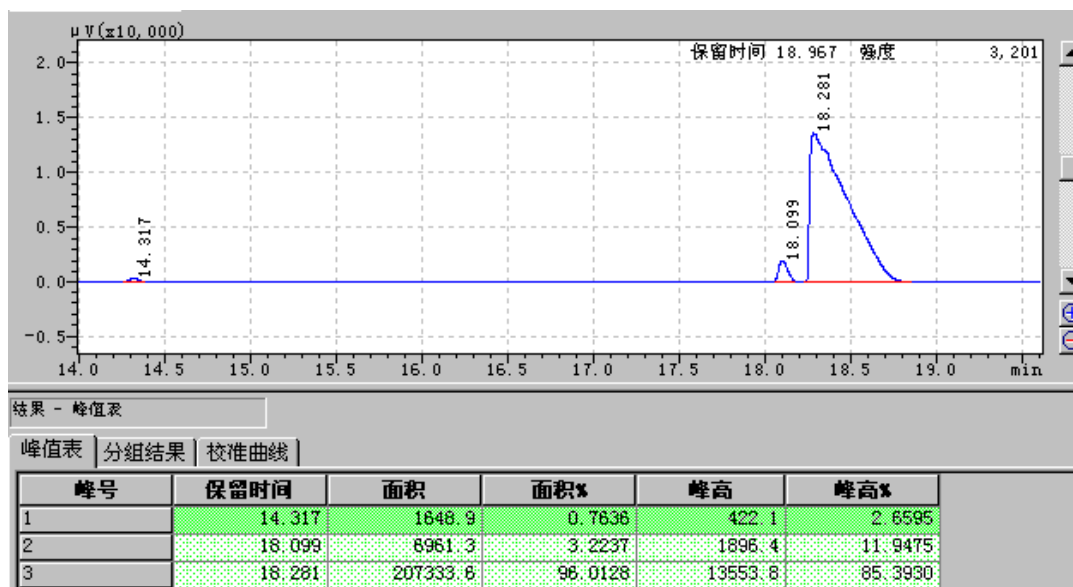

**Table 2.** Scope of **3**-catalyzed asymmetric transfer hydrogenation.<sup>[a]</sup>

| Entry | Substrate                                                                           | Product                                                                             | Time    | Conv (%) | Ee (%) <sup>[b]</sup> |
|-------|-------------------------------------------------------------------------------------|-------------------------------------------------------------------------------------|---------|----------|-----------------------|
| 1     | 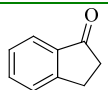   |    | 7 (8)   | >99      | 96(95) <sup>[c]</sup> |
| 2     |    |    | 7 (8)   | >99      | 98(97) <sup>[c]</sup> |
| 3     |    |    | 1 (1.5) | >99      | 97(96) <sup>[c]</sup> |
| 4     |    |    | 6       | >99      | 93                    |
| 5     |    |    | 6 (7)   | >99      | 92(67) <sup>[c]</sup> |
| 6     |   |   | 3       | >99      | 92                    |
| 7     |  |  | 18      | >99      | 92                    |

<sup>[a]</sup> Reaction conditions: catalyst **3** (26.7 mg, 4.0  $\mu\text{mol}$  of Ir based on the ICP analysis),  $\text{HCO}_2\text{Na}$  (0.27 g, 10.0 mmol), ketone (0.40 mmol) and 2.0 mL water, at 40 °C for 1.0-18.0 h.

<sup>[b]</sup> Determined by chiral GC and HPLC analysis (Fig. S10).

<sup>[c]</sup> Data in bracket were obtained in the literature using homogeneous  $\text{Cp}^*\text{IrTsDPEN}$  as a catalyst with  $\text{Bu}_4\text{NBr}$  as a phase transfer catalyst.<sup>[7a]</sup>

**Figure S10.** Scope of **3**-catalyzed asymmetric transfer hydrogenation.

Asymmetric transfer hydrogenation of 1-indanone (S: HPLC analysis with a UV-Vis detector using a Daicel OB-H chiralcel columns( $\Phi$ 0.46 x 25 cm), Hexane/2-propanol 95:5, 1.0 mL/min, 254 nm, 25 °C) (ref: *Org. Lett.* **2004**, 6, 169).

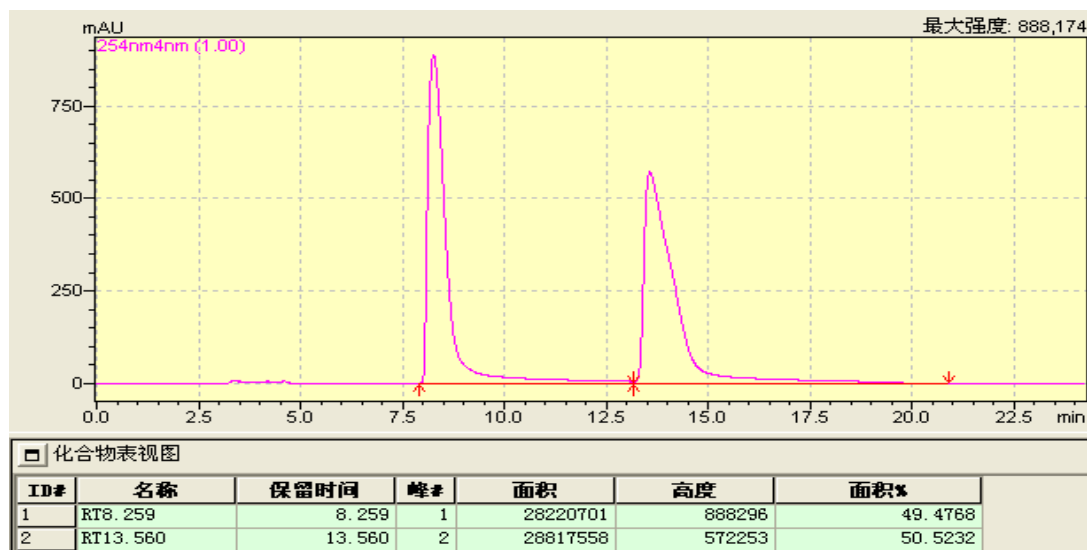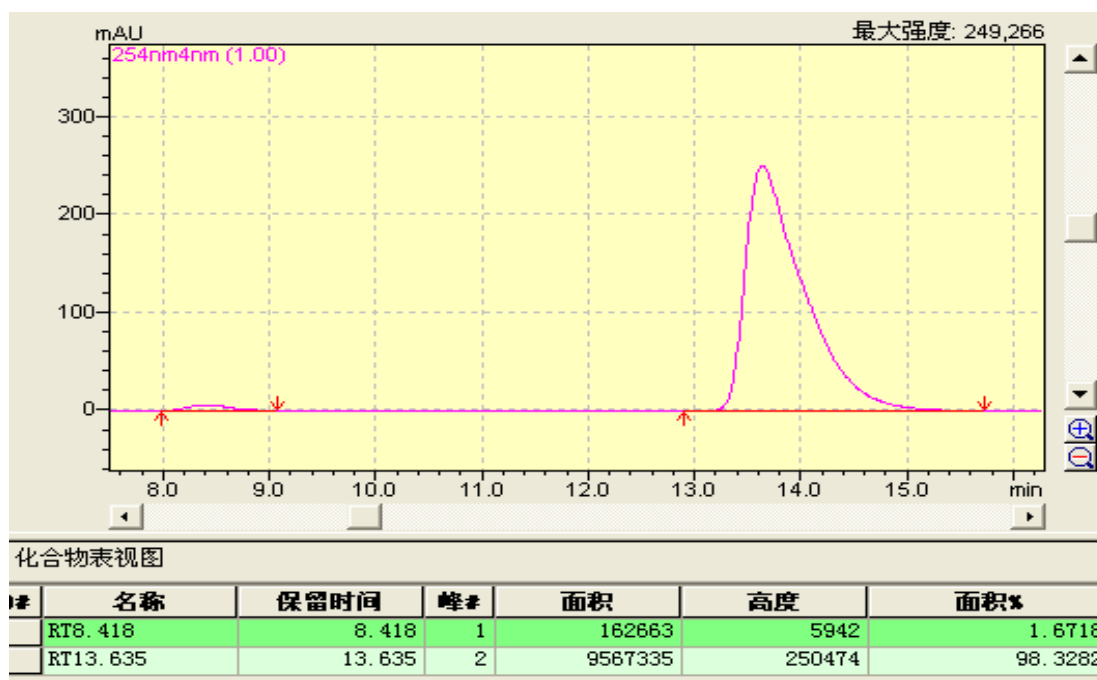

Asymmetric transfer hydrogenation of 1-teralone (S: HPLC analysis with a UV-Vis detector using a Daicel OB-H chiralcel columns( $\Phi$ 0.46 x 25 cm), Hexane/2-propanol 98.5:1.5, 1.0 mL/min, 254 nm, 25 °C) (ref: *Org. Lett.* **2004**, 6, 169).

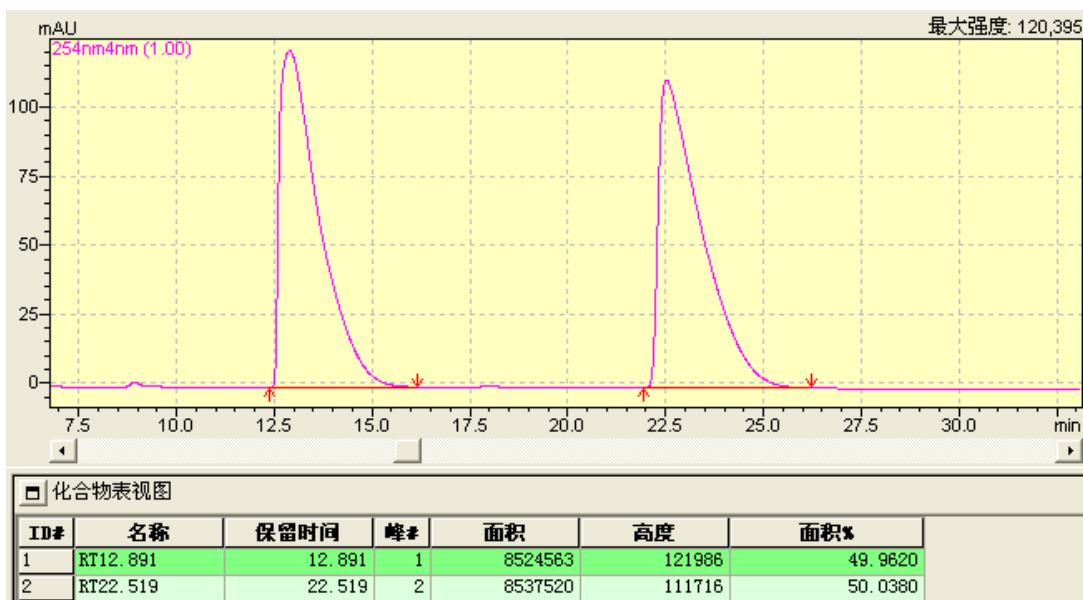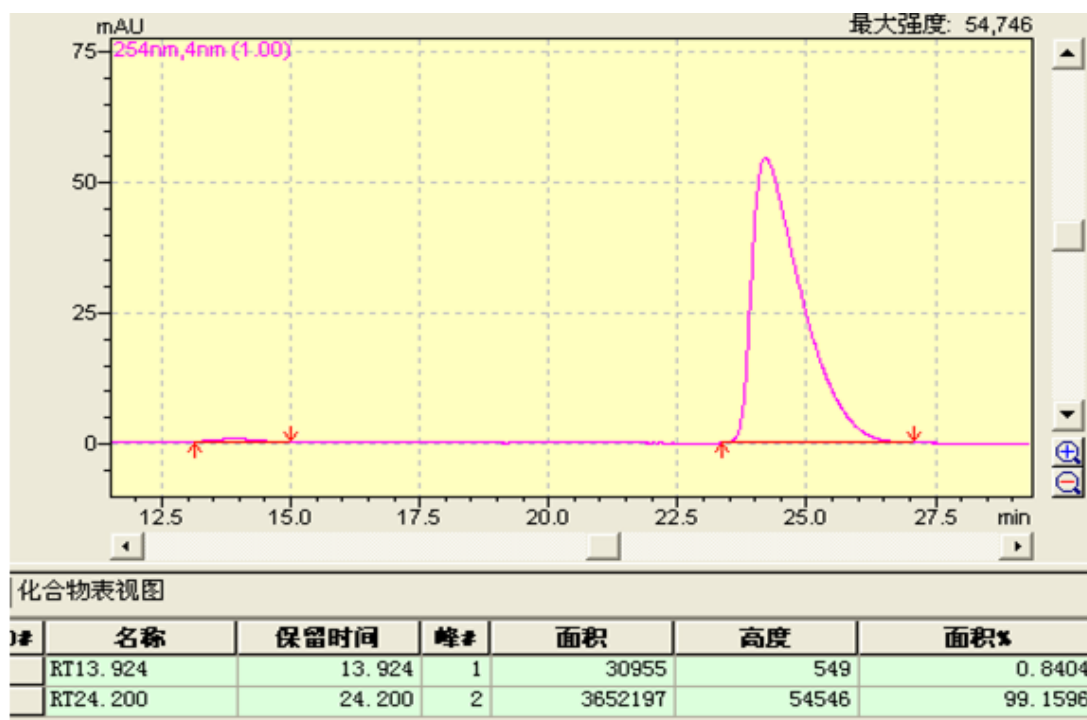

Asymmetric transfer hydrogenation of 2-furyl methyl ketone. (ref: *Org. Lett.* **2004**, 6, 169).

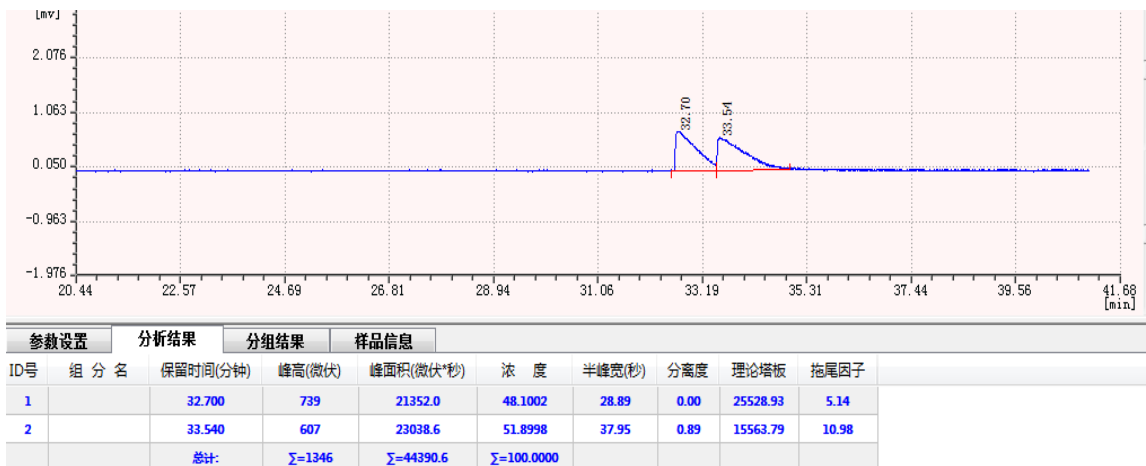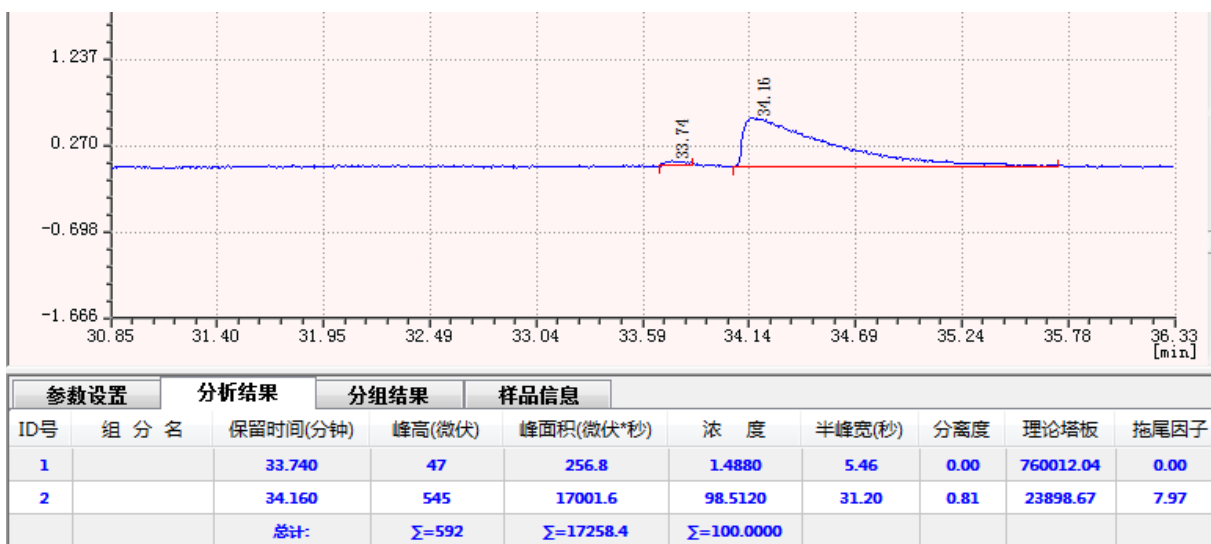

Asymmetric transfer hydrogenation of 1,2-diphenylethanone. (S: HPLC analysis with a UV-Vis detector using a Daicel OD-H chiralcel columns.( $\Phi$ 0.46 x 25 cm) Hexane/2-propanol 98:2, 1 mL/min, 254 nm, 25 °C) (ref: *Chem. Eur. J.*, 2008, **14**, 2209).

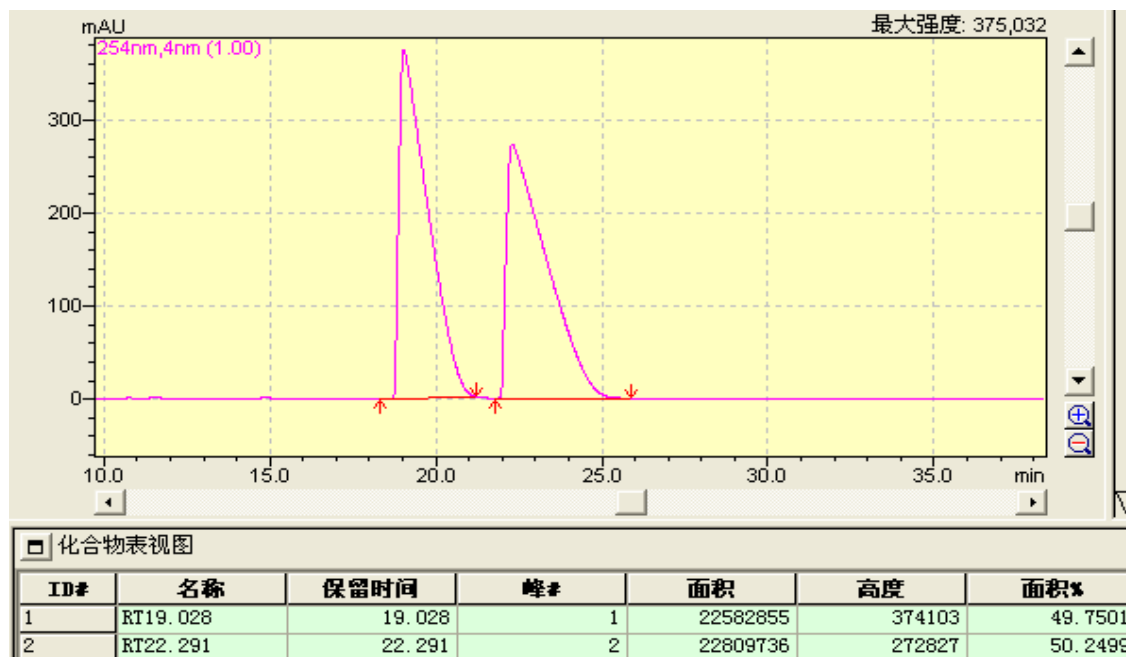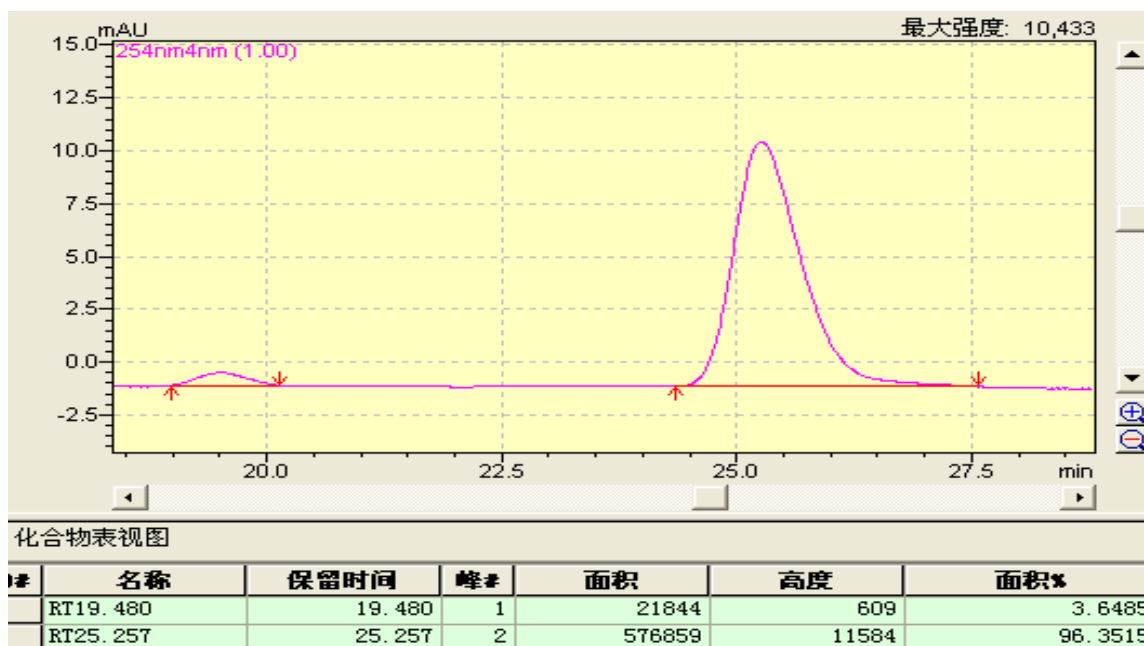

Asymmetric transfer hydrogenation of propiophenone.

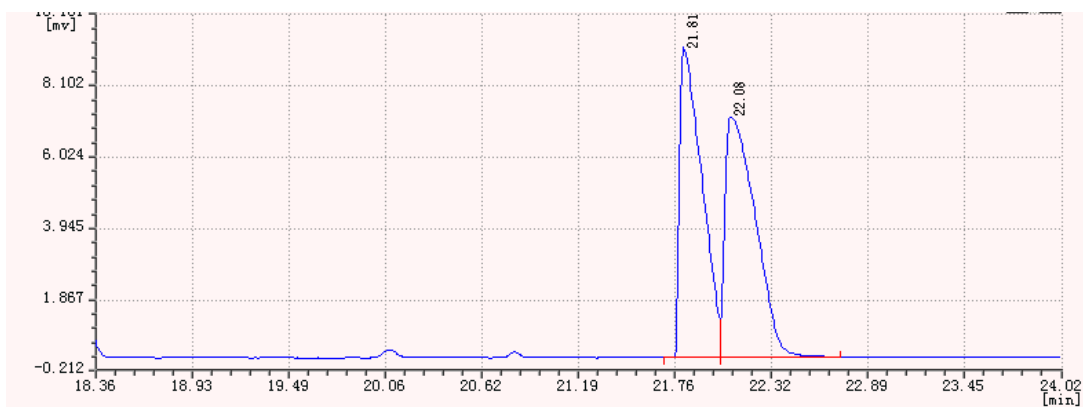

| 参数设置 |     | 分析结果     | 分组结果    | 样品信息       |            |        |      |           |      |
|------|-----|----------|---------|------------|------------|--------|------|-----------|------|
| ID号  | 组分名 | 保留时间(分钟) | 峰高(微伏)  | 峰面积(微伏*秒)  | 浓度         | 半峰宽(秒) | 分离度  | 理论塔板      | 拖尾因子 |
| 1    |     | 21.807   | 9049    | 81225.4    | 48.6052    | 8.98   | 0.00 | 117630.61 | 2.92 |
| 2    |     | 22.080   | 7000    | 85887.2    | 51.3948    | 12.27  | 0.91 | 64544.85  | 3.00 |
|      |     | 总计:      | Σ=16049 | Σ=167112.7 | Σ=100.0000 |        |      |           |      |

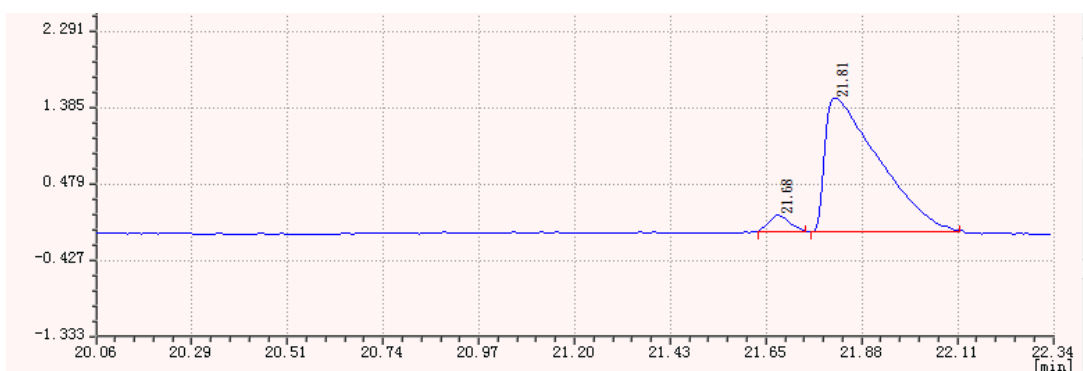

| 参数设置 |     | 分析结果     | 分组结果   | 样品信息      |            |        |      |           |      |
|------|-----|----------|--------|-----------|------------|--------|------|-----------|------|
| ID号  | 组分名 | 保留时间(分钟) | 峰高(微伏) | 峰面积(微伏*秒) | 浓度         | 半峰宽(秒) | 分离度  | 理论塔板      | 拖尾因子 |
| 1    |     | 21.680   | 198    | 721.0     | 4.7698     | 3.64   | 0.00 | 706485.17 | 1.18 |
| 2    |     | 21.813   | 1588   | 14395.0   | 95.2302    | 9.06   | 0.74 | 115410.78 | 3.80 |
|      |     | 总计:      | Σ=1786 | Σ=15116.0 | Σ=100.0000 |        |      |           |      |



Asymmetric transfer hydrogenation of ethyl 3-oxo-3-phenylpropanoate. (S: HPLC analysis with a UV-Vis detector using a Daicel OB-H chiralcel columns ( $\Phi 0.46 \times 25$  cm), Hexane/2-propanol 90:10, 0.5 mL/min, 254 nm, 25 °C) (ref: *J. Org. Chem.* **2001**, 66, 8682).

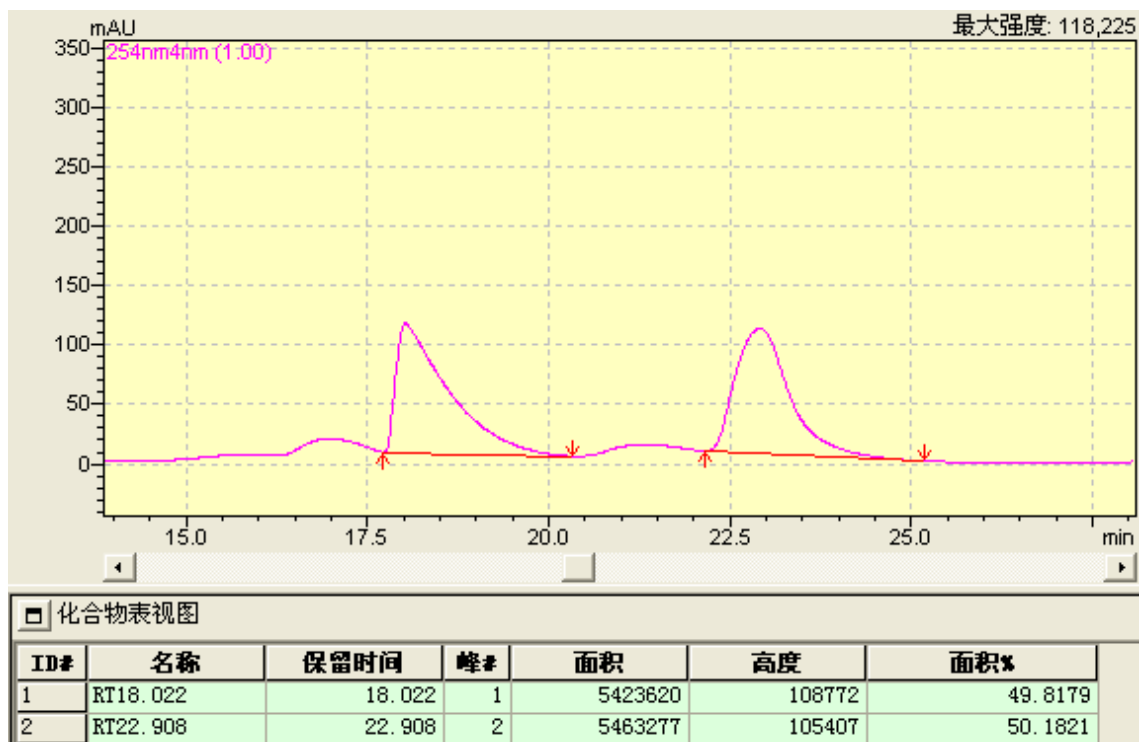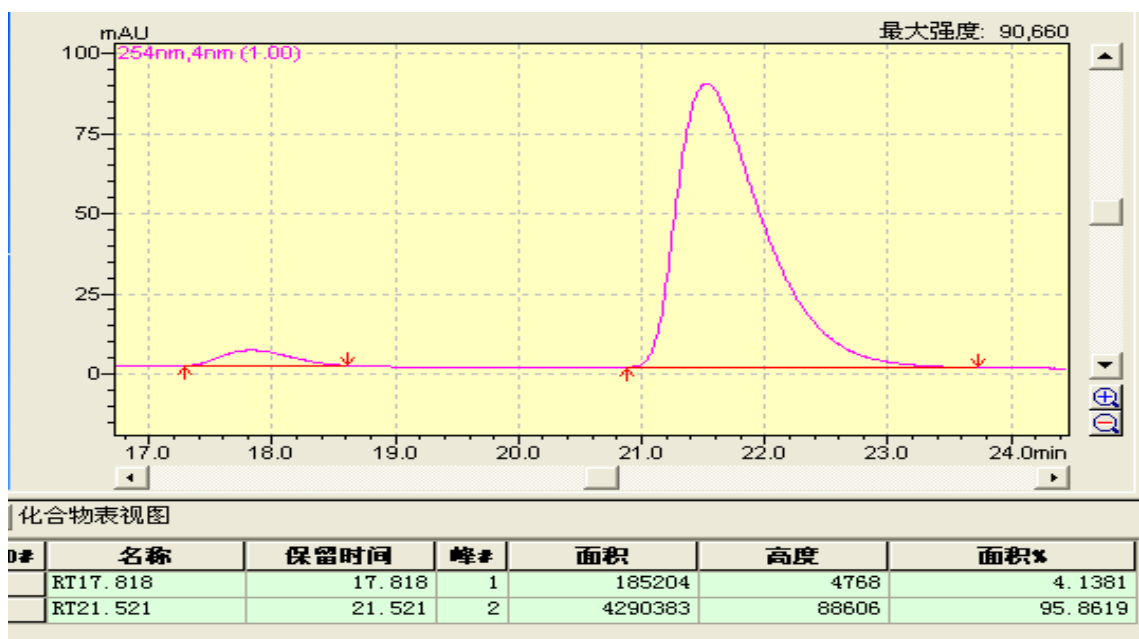

Asymmetric transfer hydrogenation of benzoylacetonitrile (S: HPLC analysis with a UV-Vis detector using a Daicel OJ-H chiralcel columns ( $\Phi$ 0.46 x 25 cm), Hexane/2-propanol 90:10, 1 mL/min, 215 nm, 25 °C) (ref: O. Soltani, M. A. Ariger, H. Vázquez-Villa, and E. M. Carreira, *Org. Lett.* **2010**, *12*, 2893.).

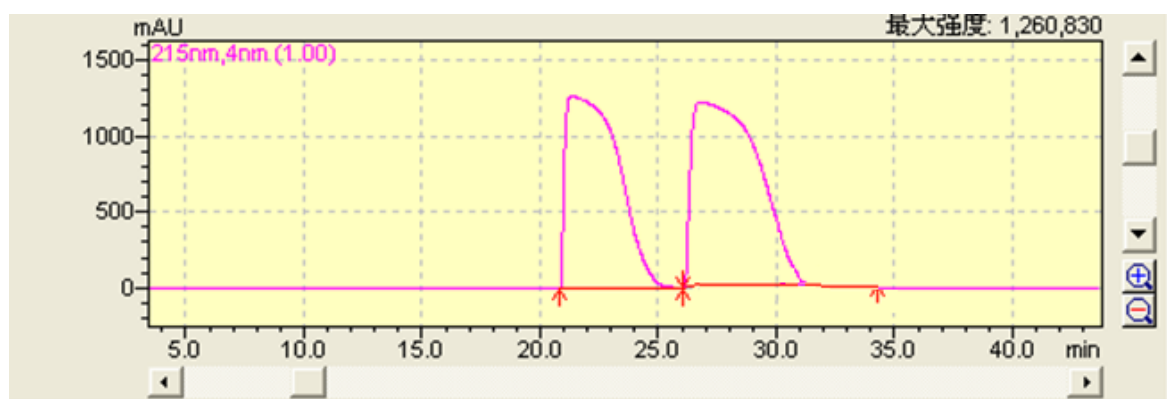

化合物表视图

| ID# | 名称       | 保留时间   | 峰# | 面积        | 高度      | 面积%     |
|-----|----------|--------|----|-----------|---------|---------|
| 1   | RT21.317 | 21.317 | 1  | 195328773 | 1258468 | 48.0427 |
| 2   | RT26.731 | 26.731 | 2  | 211244175 | 1190812 | 51.9573 |

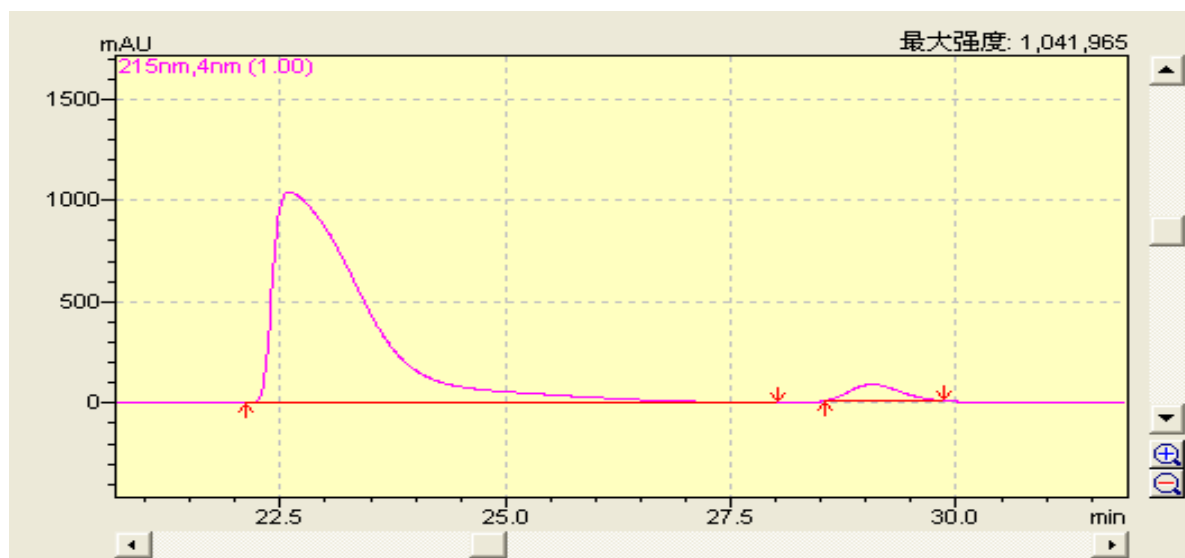

化合物表视图

| # | 名称       | 保留时间   | 峰# | 面积       | 高度      | 面积%     |
|---|----------|--------|----|----------|---------|---------|
| 1 | RT22.592 | 22.592 | 1  | 72635013 | 1041426 | 95.8045 |
| 2 | RT29.063 | 29.063 | 2  | 3180866  | 82021   | 4.1955  |
